# Supplementary material
Source: PubMed Central journal article supplement (PMC3365759)

**Supplemental Figure 1. STAT3 does not regulate tumorigenesis in *Apc<sup>min/+</sup>* mice. A.** STAT3 deletion in IEC in the intestines was confirmed by IHC. **B.** Confirmation of STAT3 deletion in IEC in the intestines by immunoblotting (IB). IEC from the small intestines of the indicated mice were isolated and the total cell lysates were subjected to IB. **C.** Deletion of STAT3 does not affect tumorigenesis in *Apc<sup>min/+</sup>* mice. Tumors (>2mm) in the small and large intestines were counted and each dot represents a mouse. **D.** STAT3 does not regulate proliferation of IEC. The BrdU incorporation was measured by IHC 2hrs post BrdU injection (i.p.) in the normal (upper panel) and in the tumor regions of the small intestines (lower panel).

# Supplemental Figure 1

A

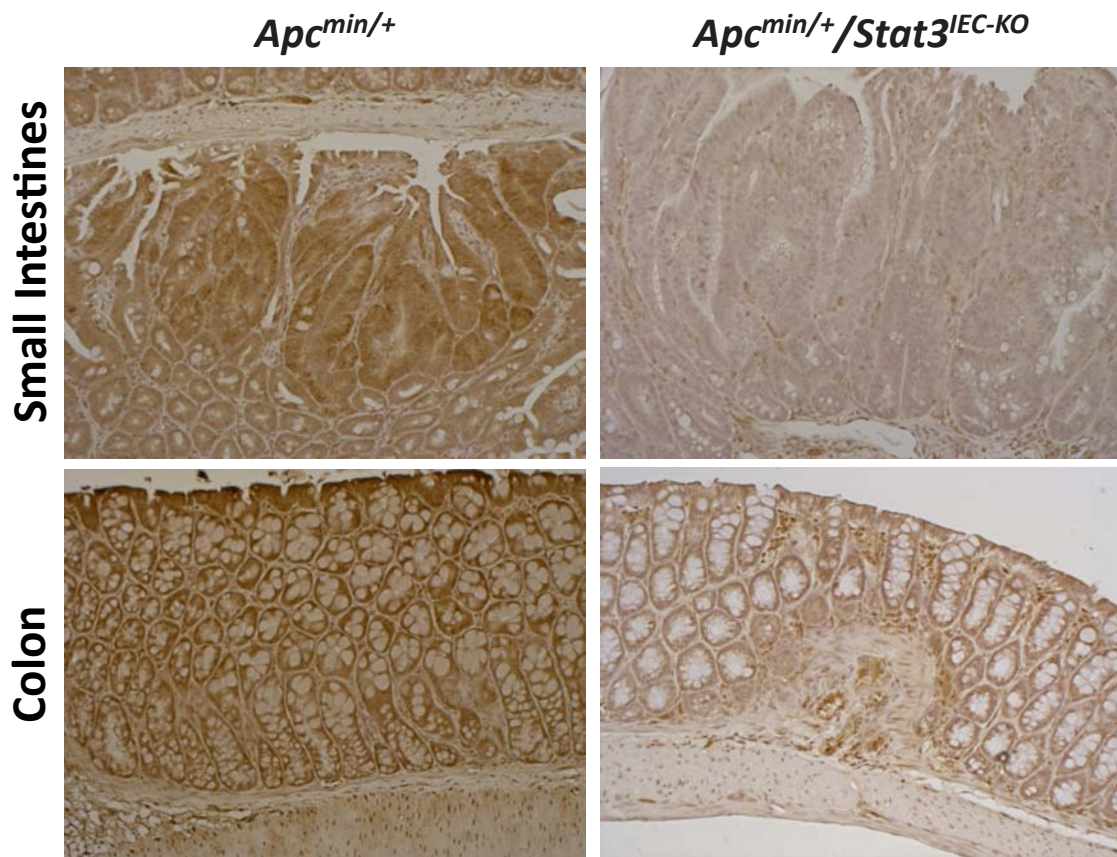

B

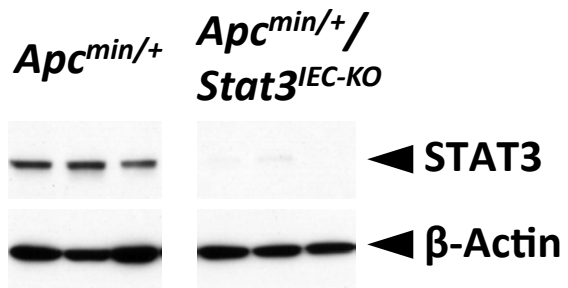

C

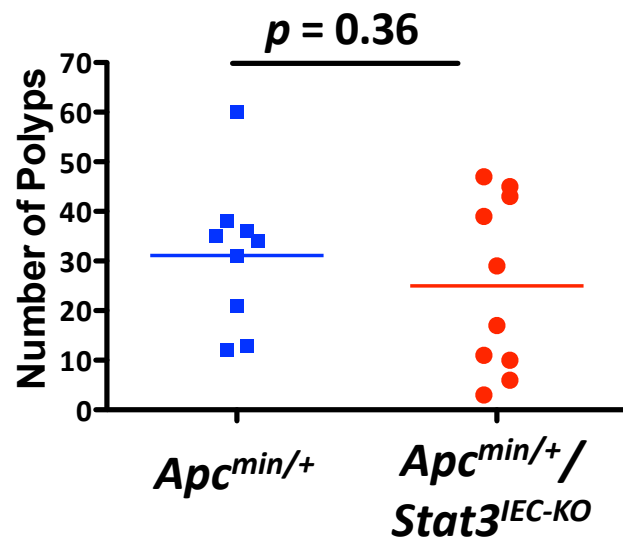

D

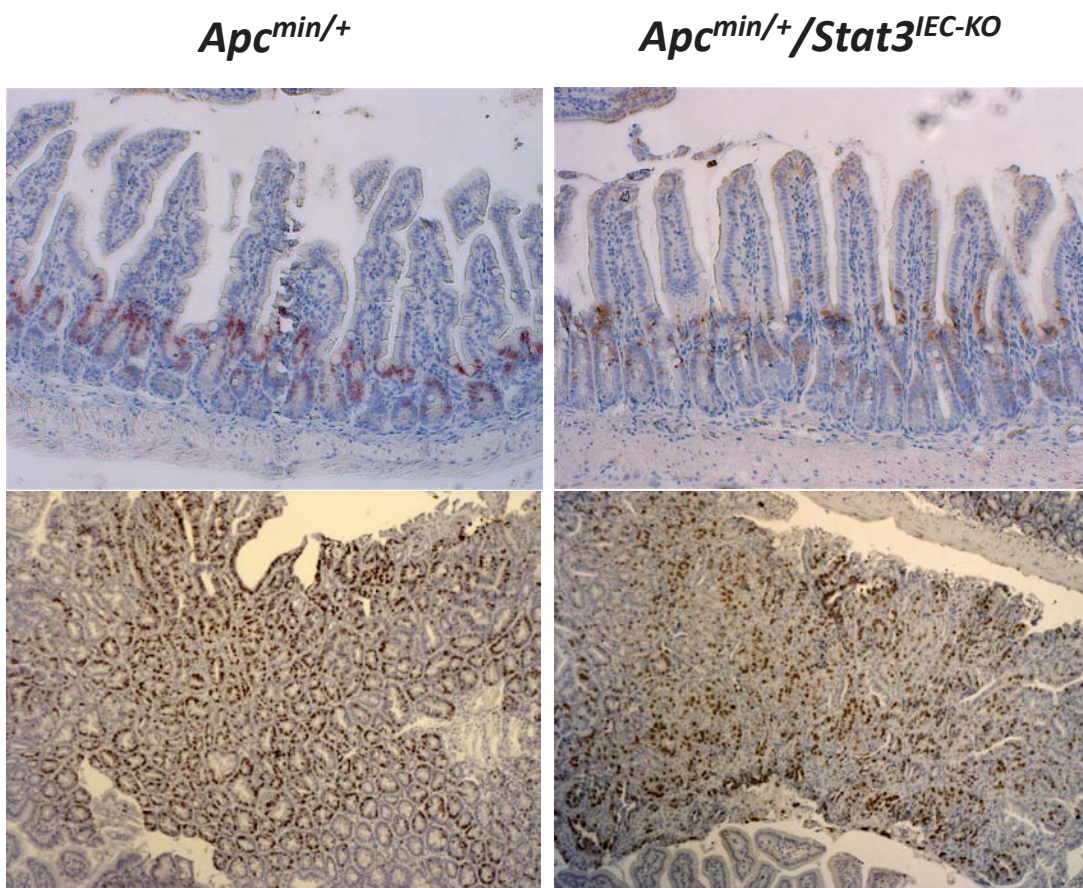

**Supplemental Figure 2. Expression of MMPs in *Apc*<sup>min/+</sup> and *Apc*<sup>min/+</sup>/*Stat3*<sup>IEC-KO</sup> mice**

STAT3 promotes the expression of MMP7 but has little impact on MMP9 and MMP15.

The indicated MMPs were localized by confocal imaging.

# Supplemental Figure 2

*Apc<sup>min/+</sup>*

*Apc<sup>min/+</sup>/Stat3<sup>IEC-KO</sup>*

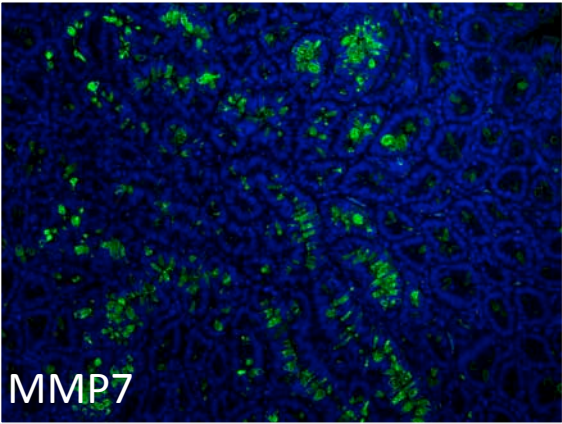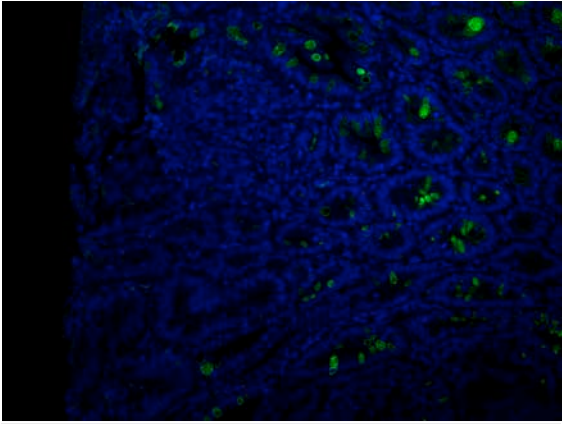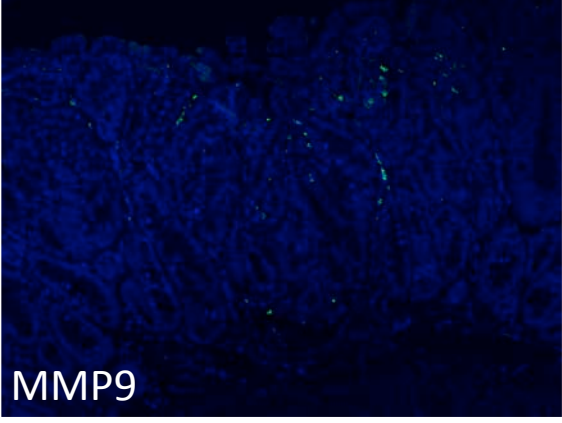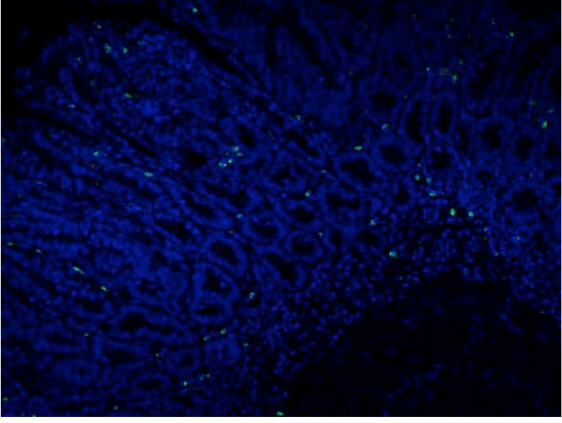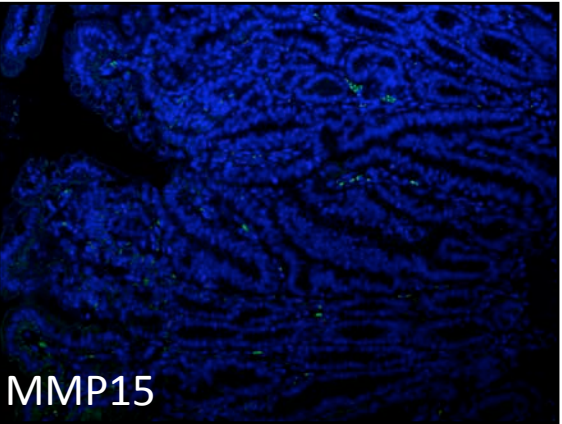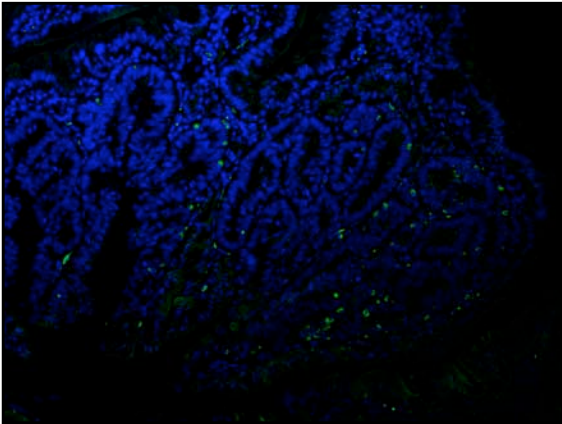

**Supplemental Figure 3. Expression of EMT inducers in *Apc<sup>min/+</sup>* and *Apc<sup>min/+</sup>/Stat3<sup>IEC-KO</sup>***

**mice** STAT3 does not regulate the expression of Zeb-1 and Slug. The indicated proteins in the indicated tumor cells were measured by IB.

## Supplemental Figure 3

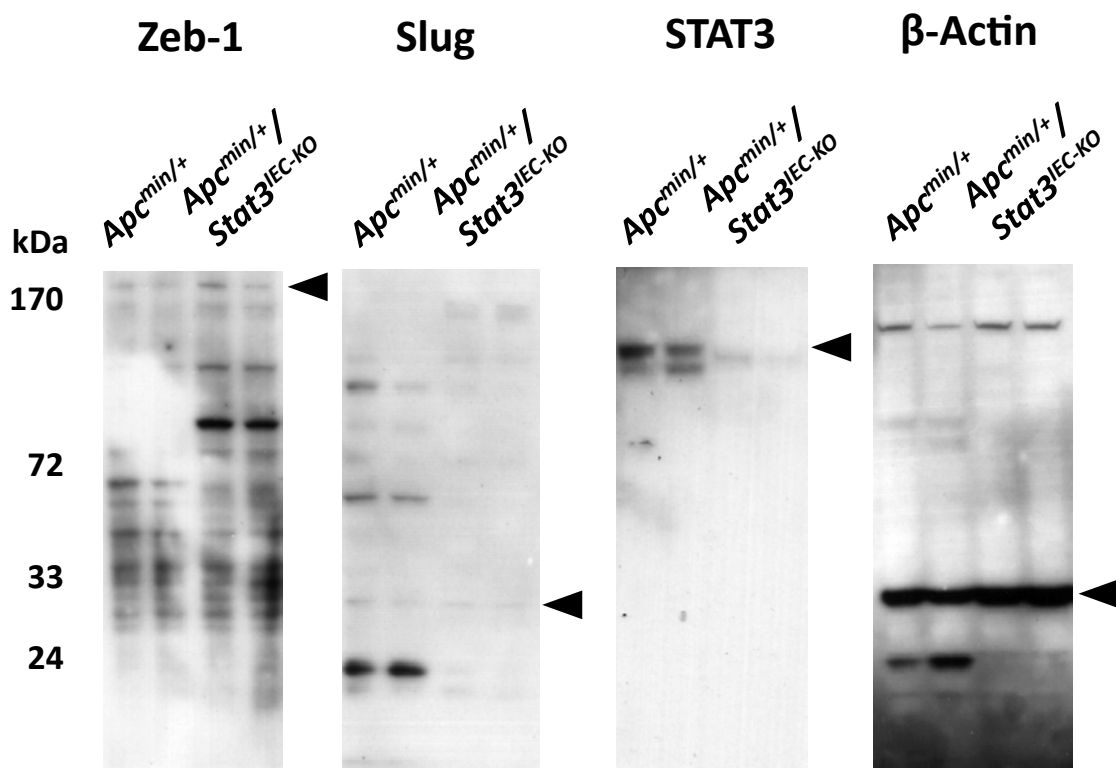

Supplement: supp_M111.328831_jbc.M111.328831-1.pdf [file supp_M111.328831_jbc.M111.328831-1.pdf]
